# Supplementary material for: Enhancement of Vancomycin Potential against Pathogenic Bacterial Strains via Gold Nano-Formulations: A Nano-Antibiotic Approach
Source: MDPI journal article supplement (doi:10.3390/ma15031108), 2022-01-31
Supplement: s1 [file s1]

## Article

# Enhancement of Vancomycin Potential against Pathogenic Bacterial Strains via Gold Nano-Formulations: A Nano-Antibiotic Approach

Turki Al Hagbani <sup>1</sup>, Hemant Yadav <sup>2</sup>, Afrasim Moin <sup>1</sup>, Amr Selim Abu Lila <sup>1,3</sup>, Khalid Mehmood <sup>4</sup>, Farhan Alshammari <sup>1</sup>, Salman Khan <sup>5</sup>, El-Sayed Khafagy <sup>6,7</sup>, Talib Hussain <sup>8,\*</sup>, Syed Mohd Danish Rizvi <sup>1,\*</sup> and Marwa H. Abdallah <sup>1,3</sup>

<sup>1</sup> Department of Pharmaceutics, College of Pharmacy, University of Ha'il, Ha'il 81442, Saudi Arabia; t.alhagbani@uoh.edu.sa (T.A.H.); afrasimmoin@yahoo.co.in (A.M.); a.abulila@uoh.edu.sa (A.S.A.L.); frh.alshammari@uoh.edu.sa (F.A.); mh.abdallah@uoh.edu.sa (M.H.A.)

<sup>2</sup> Department of Pharmaceutics, RAK College of Pharmaceutical Sciences, RAK Medical & Health Sciences University, Ras Al Khaimah 11172, United Arab Emirates; hemant@rakmhsu.ac.ae

<sup>3</sup> Department of Pharmaceutics and Industrial Pharmacy, Faculty of Pharmacy, Zagazig University, Zagazig 44519, Egypt

<sup>4</sup> Department of Pharmacy, Abbottabad University of Science and Technology, Havelian 22010, Pakistan; adckhalid@gmail.com

<sup>5</sup> Nanomedicine and Nanotechnology Lab, Department of Biosciences, Integral University, Lucknow 226026, India; salmank@iul.ac.in

<sup>6</sup> Department of Pharmaceutics, College of Pharmacy, Prince Sattam Bin Abdulaziz University, Al-kharj 11942, Saudi Arabia; e.khafagy@psau.edu.sa

<sup>7</sup> Department of Pharmaceutics and Industrial Pharmacy, Faculty of Pharmacy, Suez Canal University, Ismailia 41522, Egypt

<sup>8</sup> Department of Pharmacology and Toxicology, College of Pharmacy, University of Ha'il, Ha'il 81442, Saudi Arabia

\* Correspondence: mdth\_ah@yahoo.com (T.H.); syeddanishpharmacy@gmail.com (S.M.D.R.)

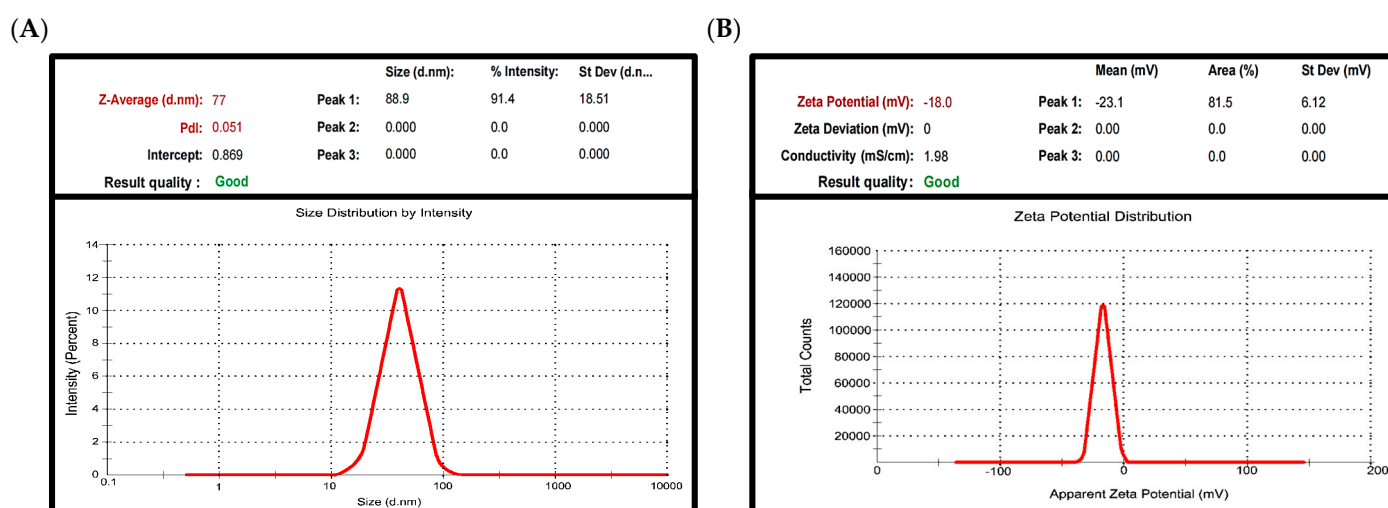

Figure S1. (A) DLS, (B) Zeta-potential of V-GNPs.
